# Supplementary material
Source: PubMed Central journal article supplement (PMC1165397)

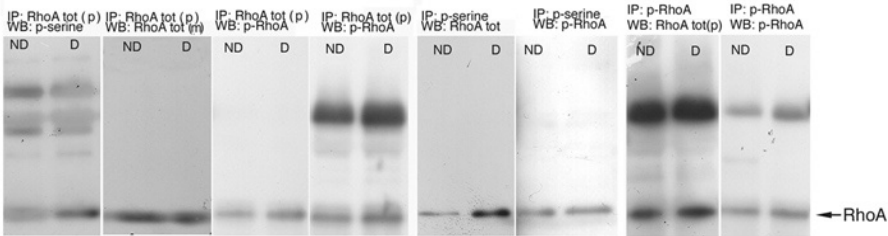

## Phospho RhoA

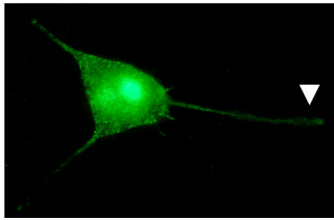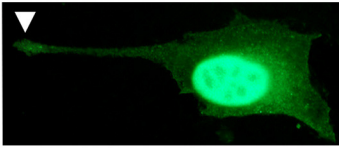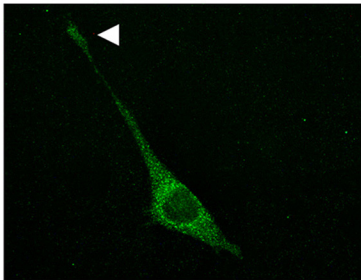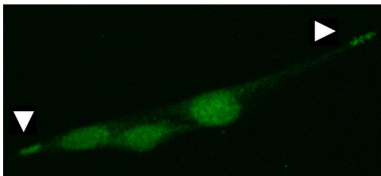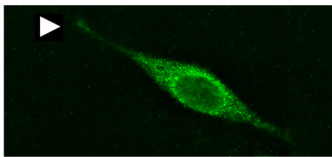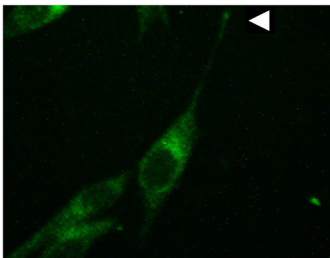

## Total RhoA

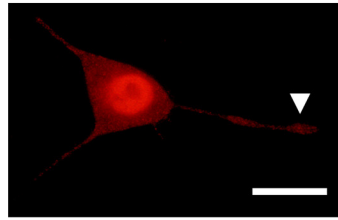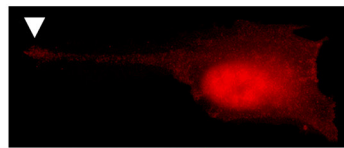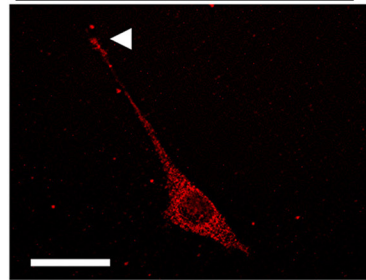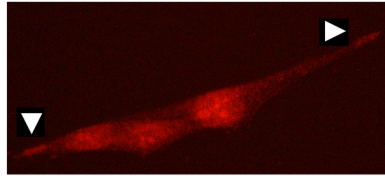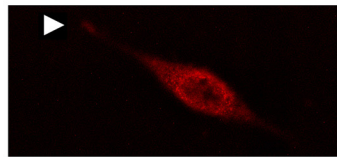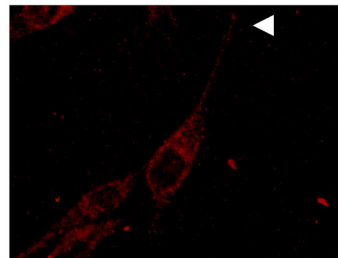

**A**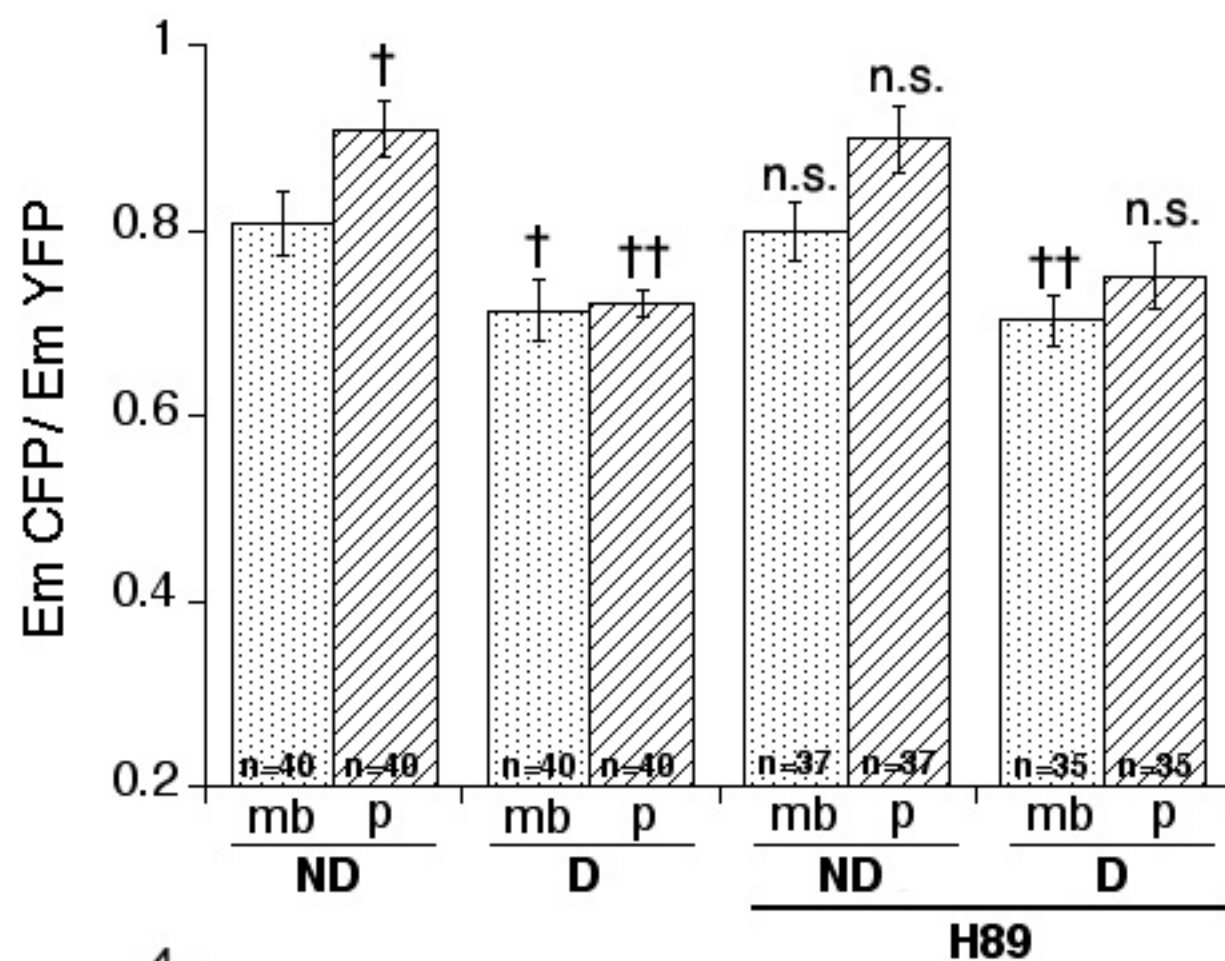**B**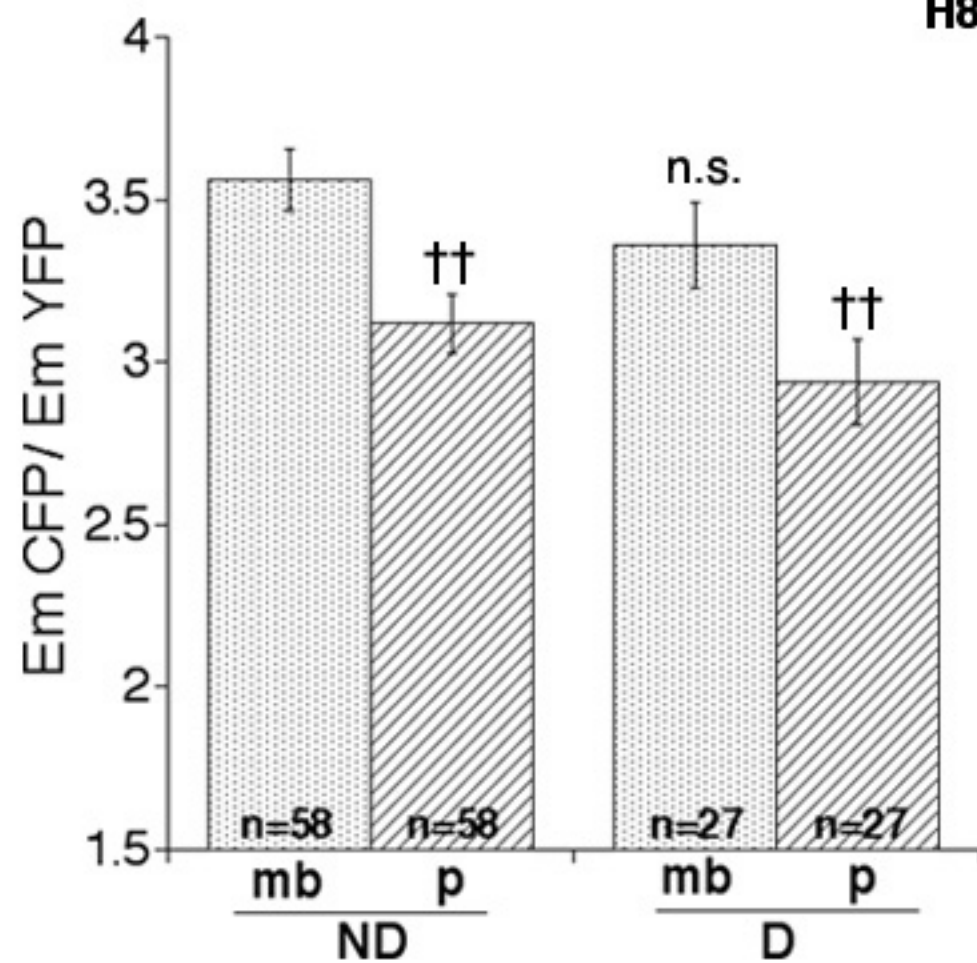

**MCF-10A**

ND

D

**MCF-7**

ND

D

**MDA-MB-231**

ND

D

**a**

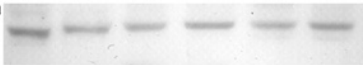

**b**

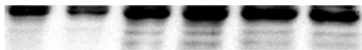

**RhoA**

**c**

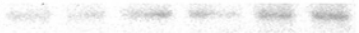

Supplement: mbc_E04-10-0945_1.pdf [file mbc_E04-10-0945_1.pdf]
